# Supplementary material
Source: PubMed Central journal article supplement (PMC2995352)
Supplement: blood-2009-10-250415_1.pdf [file blood-2009-10-250415_1.pdf]

# Supplemental Figure 1.

## Ova Beads (72 hours)

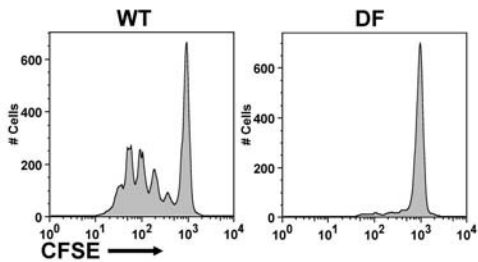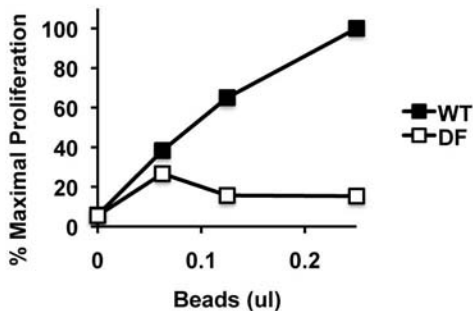

# Supplemental Figure 2.

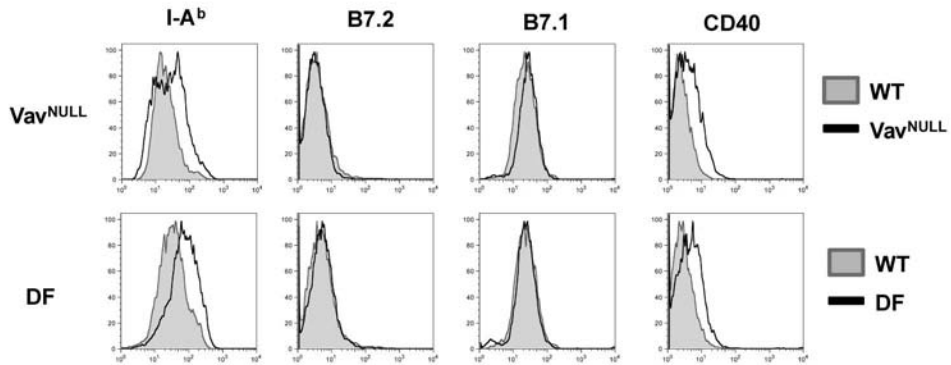

# Supplemental Figure 3.

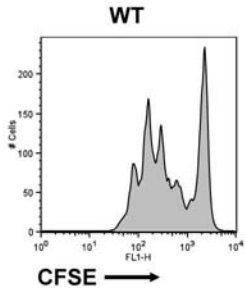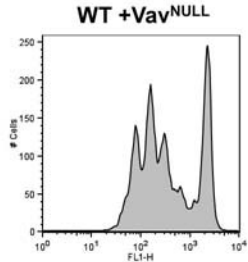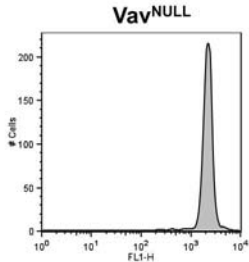

# Supplemental Figure 4.

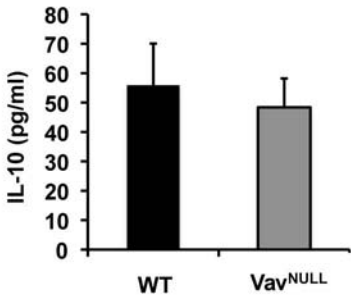

# Supplemental Figure 5.

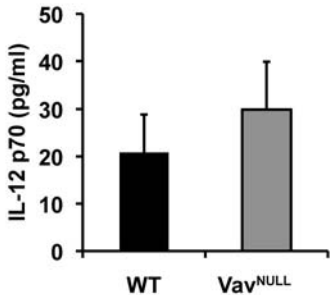

# Supplemental Figure 6.

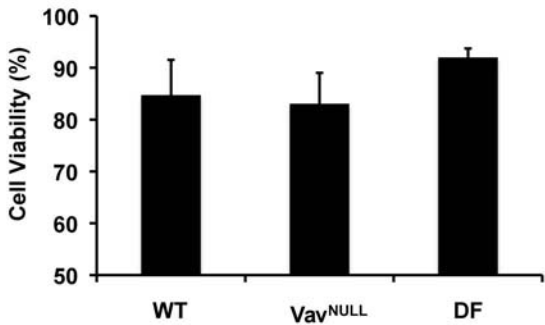

# Supplemental Figure 7.

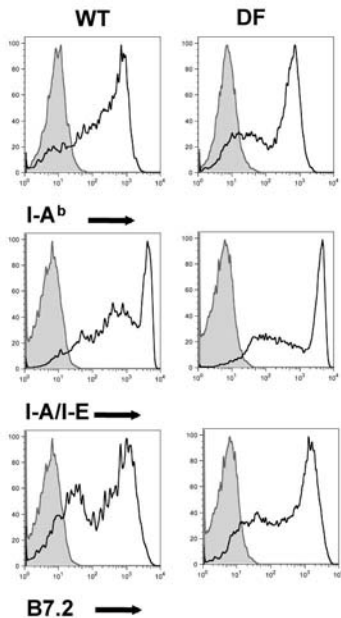

# Supplemental Figure 8.

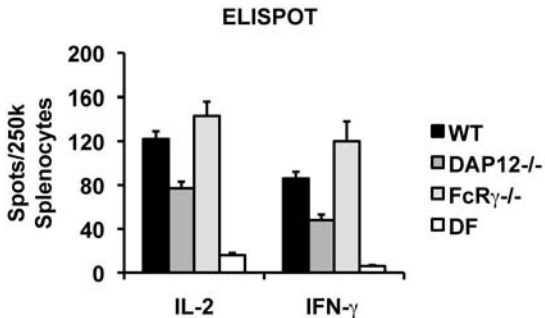



# Supplemental Figure 9.

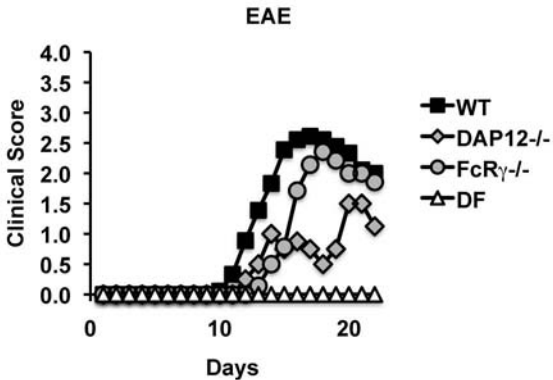

# Supplemental Figure 10.

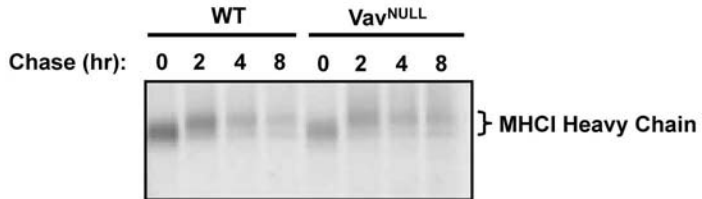

# Supplemental Figure 11.

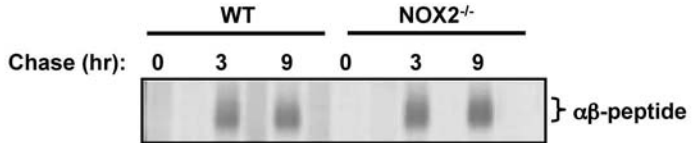

Supplemental Figure 12.

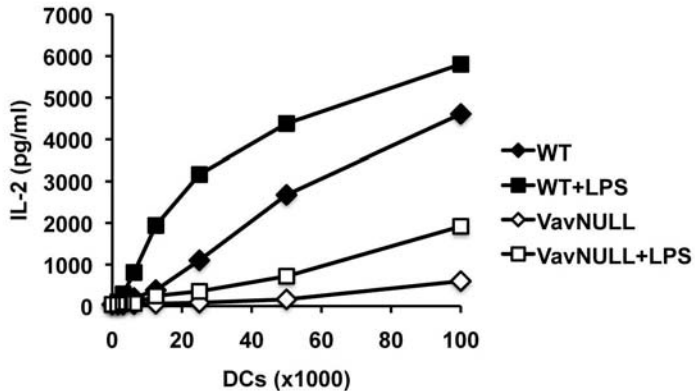

# Supplemental Figure 13.

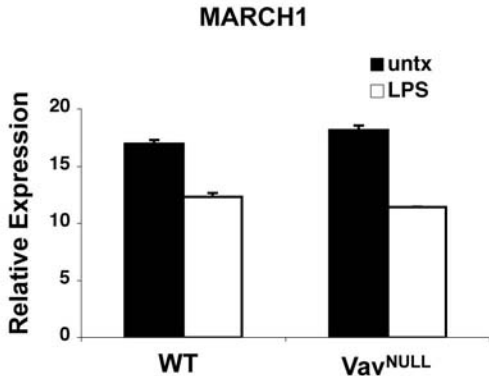

**Figure S1. ITAM Signaling is Required for Presentation of Particulate**

**Antigen by Dendritic Cells.** WT and DF DCs (50,000) were cultured with the indicated doses of ovalbumin-coated latex beads and purified OT2 T cells. T cells were analyzed for proliferation by CFSE dye dilution after 72 hours of stimulation.

**Figure S2. MHCII and Costimulatory Molecule Expression in WT and**

**ITAM Signaling deficient Dendritic Cells.** WT, Vav<sup>NULL</sup>, and DF DCs were cultured for 5-7 days and analyzed for I-A<sup>b</sup> (Clone AF6-120.1), B7.2 (Clone GL1), B7.1 (Clone 16-10A1), and CD40 (Clone 3/23) expression by flow cytometry. Knock-out expression profiles (black) are overlaid with wildtype DC expression profiles (gray).

**Figure S3. ITAM Signaling is Intrinsically Required for Dendritic Cell**

**Antigen Presentation.** WT and Vav<sup>NULL</sup> DCs were pulsed with ovalbumin peptide or in plain media prior to coculture with CFSE-labeled OT2 T cells for determination of T cell proliferation after three days. Left panel: 25x10<sup>3</sup> peptide-pulsed WT DCs and 25x10<sup>3</sup> unpulsed WT DCs. Middle panel: 25x10<sup>3</sup> peptide-pulsed WT DCs and 25x10<sup>3</sup> peptide-pulsed Vav<sup>NULL</sup> DCs. Right panel: 25x10<sup>3</sup> peptide-pulsed Vav<sup>NULL</sup> DCs and 25x10<sup>3</sup> unpulsed Vav<sup>NULL</sup> DCs.

**Figure S4. IL-10 Production is Similar Between WT and Vav<sup>NULL</sup>**

**Dendritic cells.** WT and Vav<sup>NULL</sup> DCs were cultured with ovalbumin antigen in the presence of OT-II T cells for 24 hours. Supernatants were collected and assayed for production of IL-10 by Cytometric Bead Array analysis (BD Biosciences). Data from 9 different samples were analyzed and are shown as mean ± s.d. (p value= 0.211).

**Figure S5. IL-12 Production is Similar Between WT and Vav<sup>NULL</sup>**

**Dendritic Cells.** WT and Vav<sup>NULL</sup> DCs were cultured with ovalbumin antigen in the presence of OT-II T cells for 24 hours. Supernatants were collected and assayed for production of IL-12p70 by Cytometric Bead Array analysis (BD Biosciences). Data from 6 different samples were pooled and are shown as mean  $\pm$  s.d. (p value= 0.115).

**Figure S6. Cell Viability of WT and ITAM Signaling Deficient**

**Dendritic Cells After Peptide Pulse, Wash, and Overnight Culture.** WT, Vav<sup>NULL</sup>, and DF DCs were pulsed with a saturating dose of OT2 peptide for 2 hours at 37°C, washed in media, and cultured overnight in the absence of peptide. DCs were then analyzed for cell viability by light scatter (FSC vs SSC). Data are shown from at least 3 independent experiments and expressed as mean  $\pm$  s.d.

**Figure S7. MHCII and B7.2 Molecule Expression on Dendritic Cells**

**After CFA Immunization of WT and DF Mice.** Draining lymph nodes of WT and DF mice were analyzed by flow cytometry on day 5 post footpad immunization with CFA. MHCII and B7.2 expression was evaluated specifically on CD11c<sup>+</sup> cells. I-A<sup>b</sup> (Clone AF6-120.1), I-A/I-E (Clone M5/114.15.2), and B7.2 (Clone GL1) expression levels are shown in black, and isotype controls are shown in gray.

**Figure S8. Deletion of Both DAP12 and FcR $\gamma$  Results in CD4 T Cell**

**Priming Defects That are More Severe Than Single Deletion of DAP12 or FcR $\gamma$ .**

Mice were immunized s.c. with MOG<sub>35-55</sub> peptide in adjuvant. After 3 weeks, spleens were recovered and restimulated *in vitro* with MOG peptide to determine antigen-specific T cell frequencies by ELISPOT. Data represent the mean  $\pm$  s.e.m. for n $\geq$ 4 mice per group.

**Figure S9. Deletion of Both DAP12 and FcR $\gamma$  Results in More Severe**

**EAE Than Single Deletion of DAP12 or FcR $\gamma$ .** Mice were immunized with MOG<sub>35-55</sub> peptide and pertussis toxin to induce disease. During the course of disease, mice were assigned a clinical score with grade 1 = tail weakness, grade 2 = hind limb weakness sufficient to impair righting, grade 3 = one limb plegic, grade 4 = hind limb paralysis, grade 5 = moribund. Data are expressed as mean clinical score for  $n \geq 4$  mice per group.

**Figure S10. ITAM Signaling Does Not Regulate the Half-Life of**

**MHCI.** WT and Vav<sup>NULL</sup> DCs were pulse-labeled with [<sup>35</sup>S] for 30 minutes and chased for the indicated time points. Subsequently, cells were lysed and MHCI was immunoprecipitated (clone 28-8-6). Samples were then resolved by PAGE and analyzed by autoradiography.

**Figure S11. NOX2 Does Not Regulate the Half-Life of MHCII. WT**

and NOX2<sup>-/-</sup> DCs were pulse-labeled with [<sup>35</sup>S] for 30 minutes and chased for the indicated time points. Subsequently, cells were lysed and MHCII was immunoprecipitated (clone Y3P). Samples were then resolved by PAGE and analyzed by autoradiography.

**Figure S12. LPS Treatment Enhances Antigen Presentation in the**

**Absence of ITAM Signaling But Does Not Restore Responses to WT Levels.** WT and Vav<sup>NULL</sup> DCs were pulsed with beta-gal peptide (10  $\mu$ M), washed, and chased for 24 hours in plain media with or without LPS (100 nM). After chase, DCs were fixed and cultured with the B11 T cell hybridoma overnight. Culture supernatants were analyzed for the presence of IL-2 by ELISA.



**Figure S13. Expression of March1 is Similar Between WT and**

**Vav<sup>NULL</sup> Dendritic Cells.** WT and Vav<sup>NULL</sup> DCs were cultured for 7 days and analyzed for March1 expression by quantitative PCR. Where indicated, DCs were treated for 20 hours with LPS (100ng/ml). Data from triplicate samples were normalized to GAPDH expression.
